# Supplementary material for: AIP limits neurotransmitter release by inhibiting calcium bursts from the ryanodine receptor
Source: PubMed Central journal article supplement (PMC5680226; doi:10.1038/s41467-017-01704-z), 2017-11-09
Supplement: 41467_2017_1704_MOESM1_ESM.pdf [file 41467_2017_1704_MOESM1_ESM.pdf]

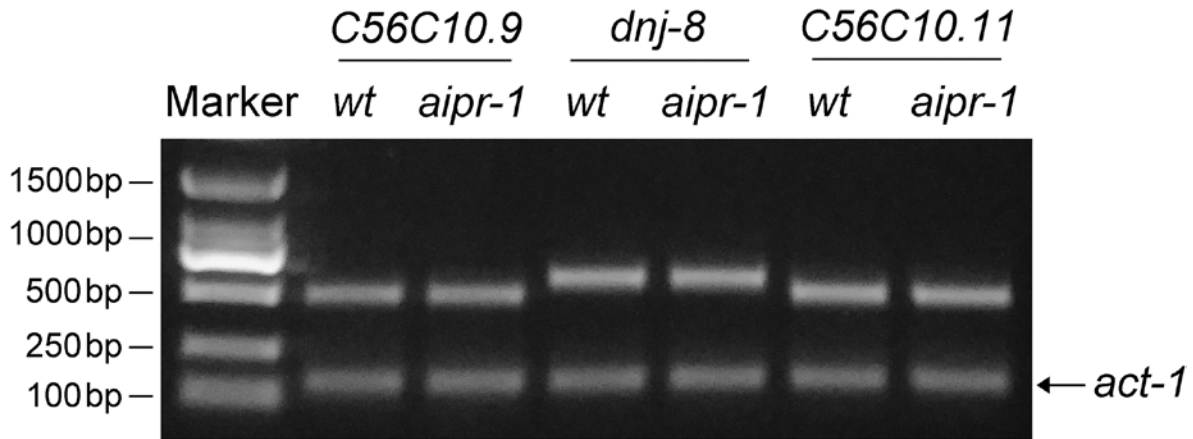

**Supplementary Figure 1. *aipr-1(zw86)* mutation did not alter transcript levels of the other three genes in the operon.** Total RNA was extracted using Trizol reagent. RT-PCR was performed using gene-specific primers. RT-PCR was also performed for *act-1* to indicate similar amount of cDNA template. C56C10.11 is likely to be part of the *epg-5* gene based on gene conservation.

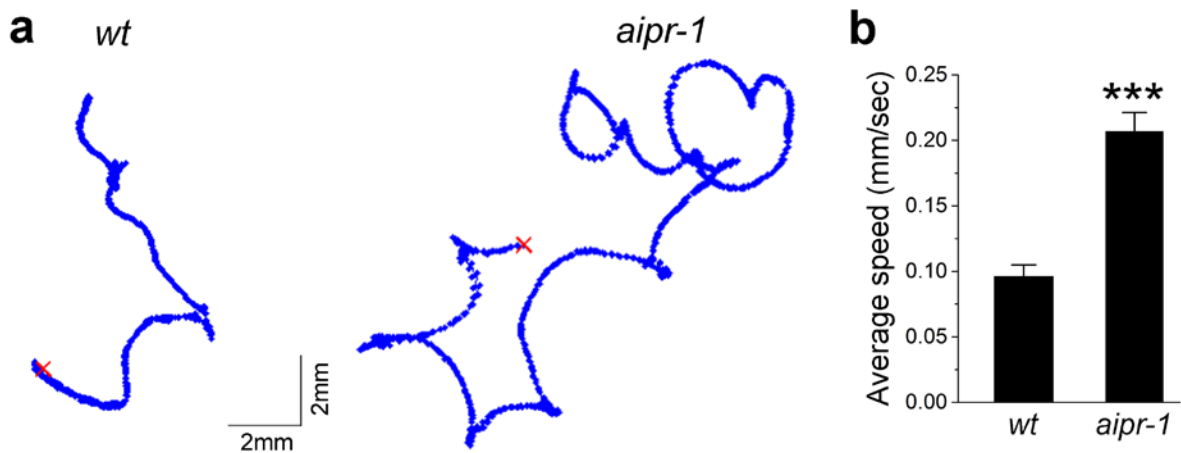

**Supplementary Figure 2. *aipr-1(zw86)* mutant worms move faster than the wild type (*wt*).** **a**, Locomotion path of representative worms over 10 minutes on agar plate seeded with a thin layer of OP50. The locomotion track was reconstructed by *Track-A-Worm*, an automated worm tracker used for the locomotion analyses. In each assay, a single young adult worm was placed in the center of an OP50 bacterial lawn, and locomotion behavior was recorded for 10 minutes after a 15-minute recovery time from the transfer. The red “x” marks the starting point. **b**, Comparison of locomotion speed between *wt* (n = 11) and *aipr-1(zw86)* mutant (n = 11). Data are shown as mean  $\pm$  s.e.m. \*\*\*  $p < 0.001$  compared with *wt* (unpaired *t*-test).

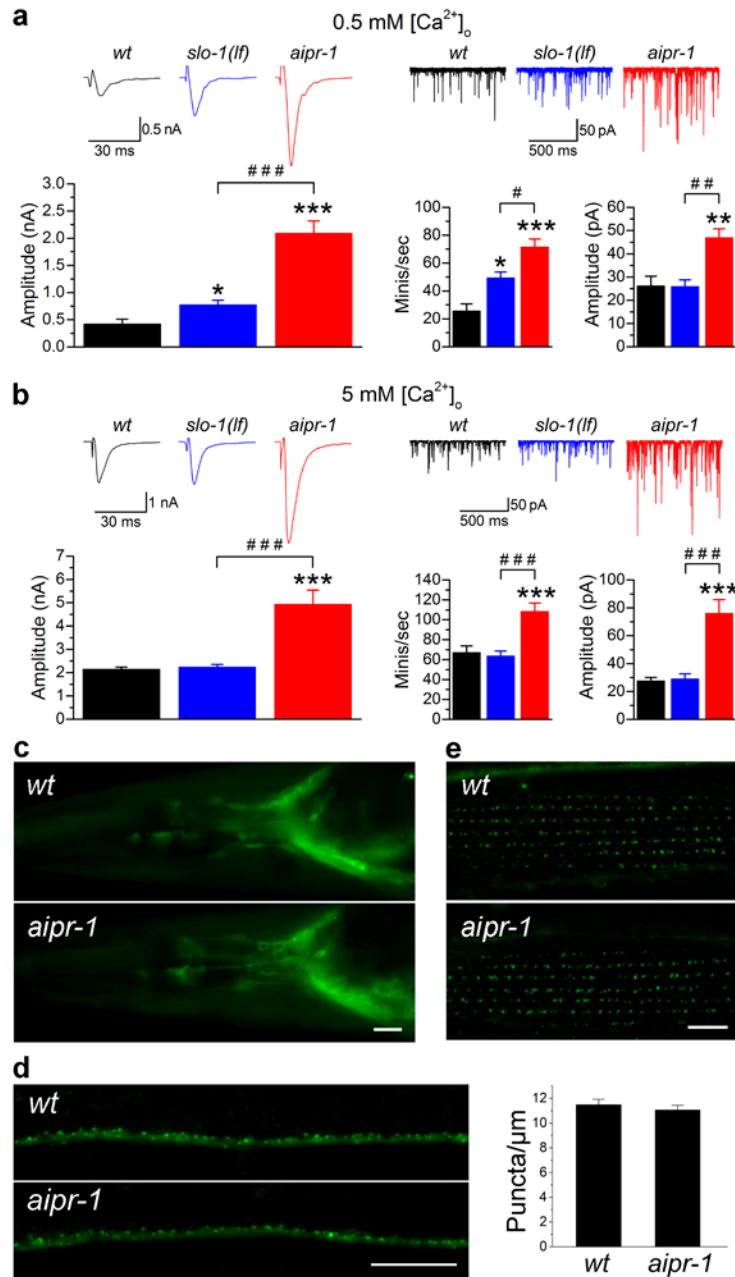

**Supplementary Figure 3. AIPR-1 does not act through SLO-1 in regulating presynaptic release at the neuromuscular junction.** **a**, Comparison of evoked currents and spontaneous miniature currents (minis) recorded at 0.5 mM  $[Ca^{2+}]_o$  (Extracellular solution II) among wild type (*wt*), *slo-1(md174)* (putative null), and *aipr-1(zw86)*.  $n = 8$  in all groups. **b**, Comparison of evoked currents and spontaneous minis recorded at 5 mM  $[Ca^{2+}]_o$  (Extracellular solution I) among the three groups (*wt*,  $n = 8$ ; *slo-1(md1745)*,  $n = 9$ ; *aipr-1(zw86)*,  $n = 7$ ). **c-e**, Deficiency of *aipr-1* does not alter SLO-1 expression or subcellular localization. SLO-1::GFP, which was expressed under the control of *Pslo-1*, is indistinguishable between *wt* and *aipr-1(zw86)*. Shown are representative images of the head region (**c**), a segment of the dorsal nerve cord (**d**), and body-wall muscle (**e**). The density of SLO-1::GFP puncta in **d** was compared between *wt* ( $n = 21$ ) and *aipr-1(zw86)* ( $n = 20$ ). Data are shown as mean  $\pm$  s.e.m. \* $P < 0.05$ , \*\* $P < 0.01$ , \*\*\* $P < 0.001$  compared with *wt*; # $P < 0.05$ , ## $P < 0.01$ , ### $P < 0.001$  compared between *slo-1(lf)* and *aipr-1(zw86)* (one-way ANOVA followed by Tukey's post hoc test). Scale bars, 10  $\mu$ m.

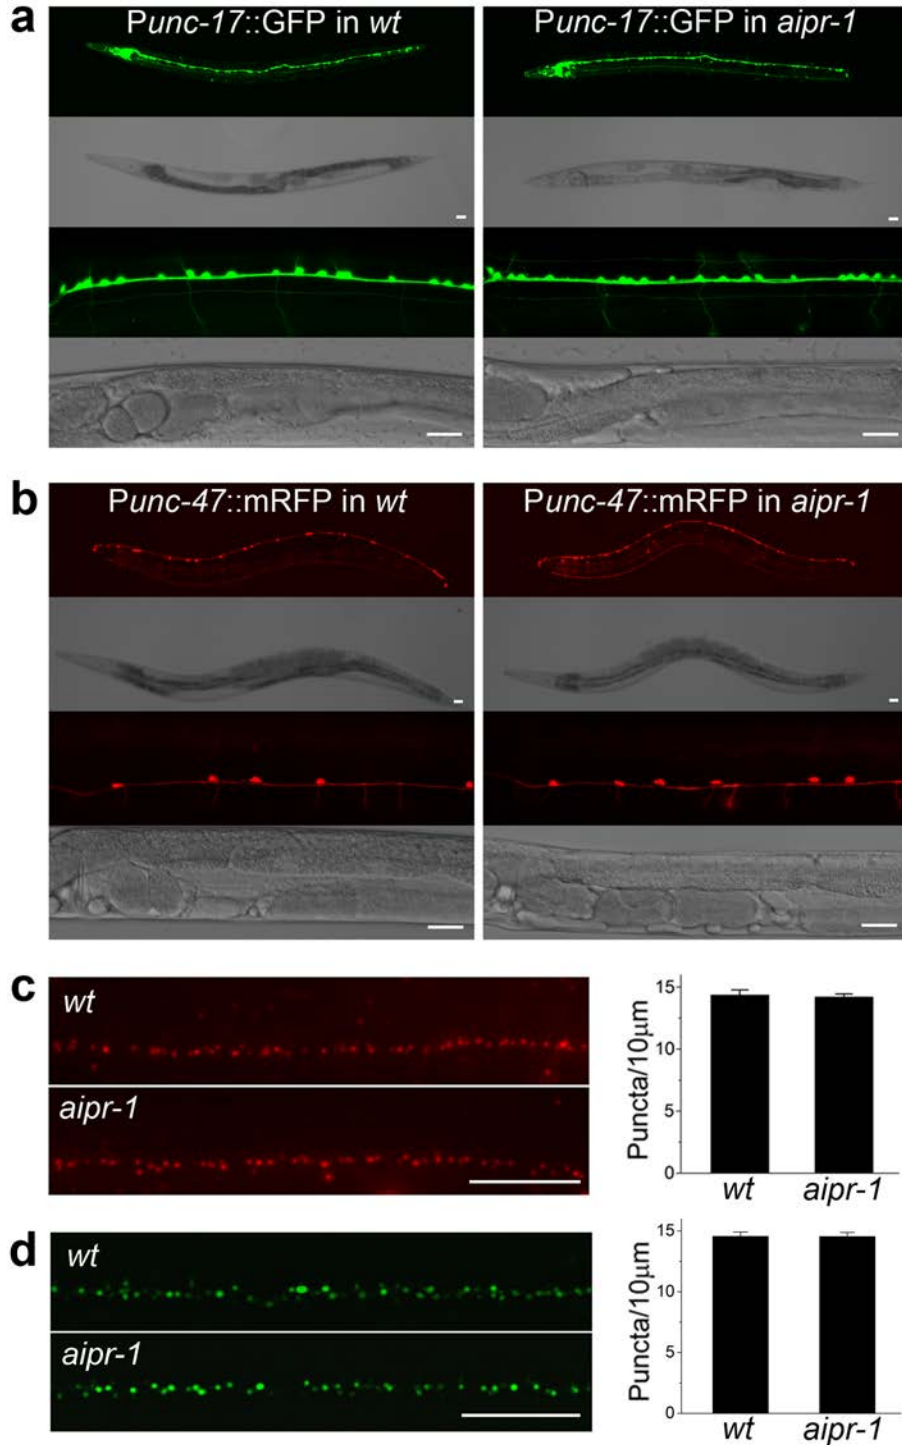

**Supplementary Figure 4. Motor neuron gross morphology and synapse density are similar between *aipr-1(zw86)* and wild type (*wt*).** **a, b**, Representative images of GFP-labeled acetylcholine motor neurons (**a**) and mRFP-labeled GABA motor neurons (**b**), and corresponding worm DIC images of *wt* and *aipr-1(zw86)*. GFP and mRFP were expressed under the control of *Punc-17* and *Punc-47*, respectively. **c** and **d**, Representative images of RIM-immunoreactive puncta (**c**, *wt* n = 22; *aipr-1* n = 27) and GFP::ELKS-1 puncta (**d**, *wt* n = 27; *aipr-1* n = 24) in the dorsal nerve cord of *wt* and *aipr-1(zw86)*, and statistical comparison of punctum density between the two groups. Scale bars, 20  $\mu$ m (**a, b**); 10  $\mu$ m (**c, d**).

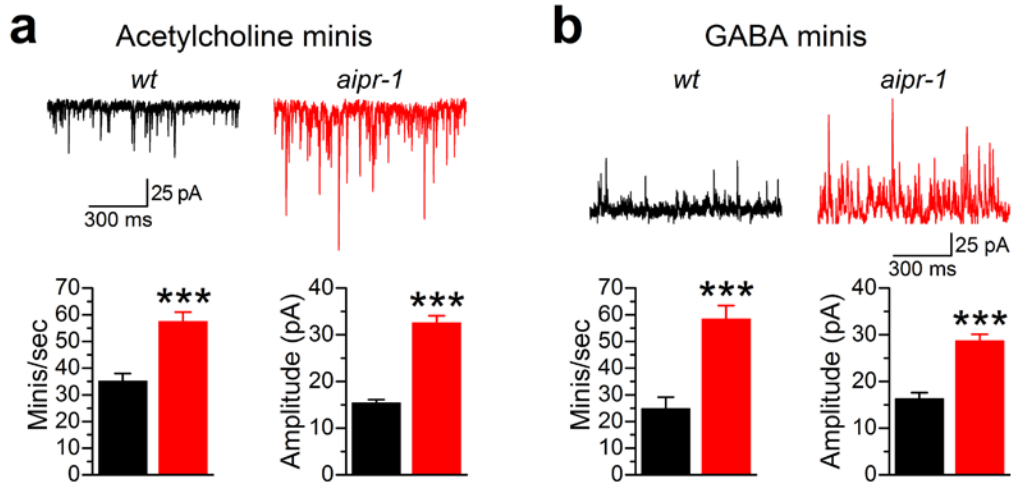

**Supplementary Figure 5. AIPR-1 deficiency augmented both acetylcholine and GABA spontaneous minis.** **a**, Comparison of acetylcholine spontaneous miniature currents (minis) between wild type (*wt*) ( $n = 9$ ) and *aipr-1(zw86)* ( $n = 9$ ). **b**, Comparison of GABA minis between *wt* ( $n = 8$ ) and *aipr-1(zw86)* ( $n = 9$ ). Extracellular solution I and pipette solution II were used in these experiments with the membrane voltage held at  $-60$  mV and  $-10$  mV to record acetylcholine and GABA (upward deflections) minis, respectively. Data are shown as mean  $\pm$  s.e.m. \*\*\*  $p < 0.001$  compared with *wt* (unpaired *t*-test).

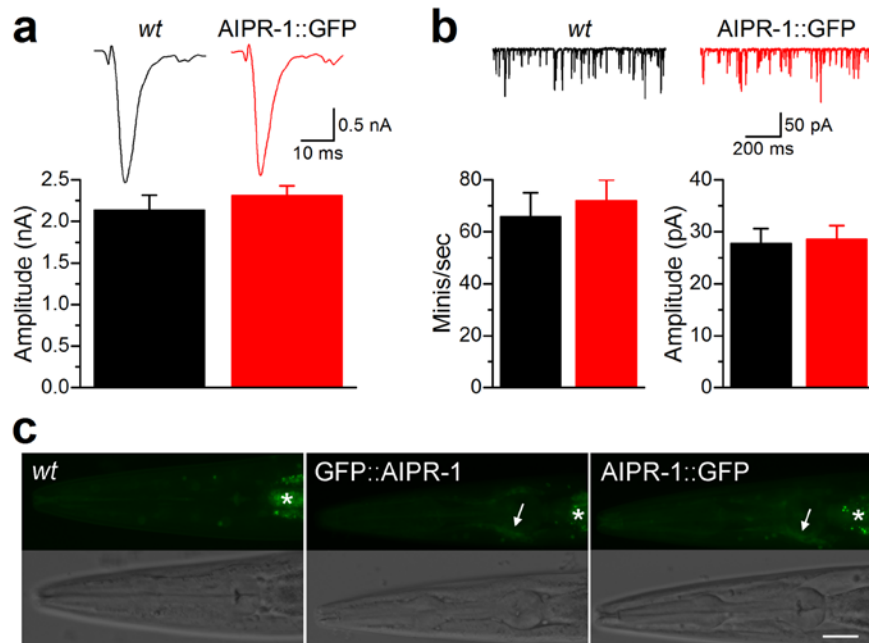

**Supplementary Figure 6. Endogenous AIPR-1 tagged by GFP using the CRISPR/Cas9 approach is functional.** **a** and **b**, Evoked responses (**a**) and spontaneous miniature currents (minis) (**b**) at the neuromuscular junction were similar between wild type (*wt*) ( $n = 8$ ) and the strain with AIPR-1 tagged at the carboxyl terminus (AIPR-1::GFP) ( $n = 8$ ). **c**, Weak GFP signal was observed in the head region but not elsewhere in both the AIPR-1::GFP strain and a strain with AIPR-1 tagged at the amino terminus (GFP::AIPR-1). No GFP signal was detected in *wt*. The asterisk (\*) marks autofluorescence from the gut. Scale bar, 20  $\mu$ m.

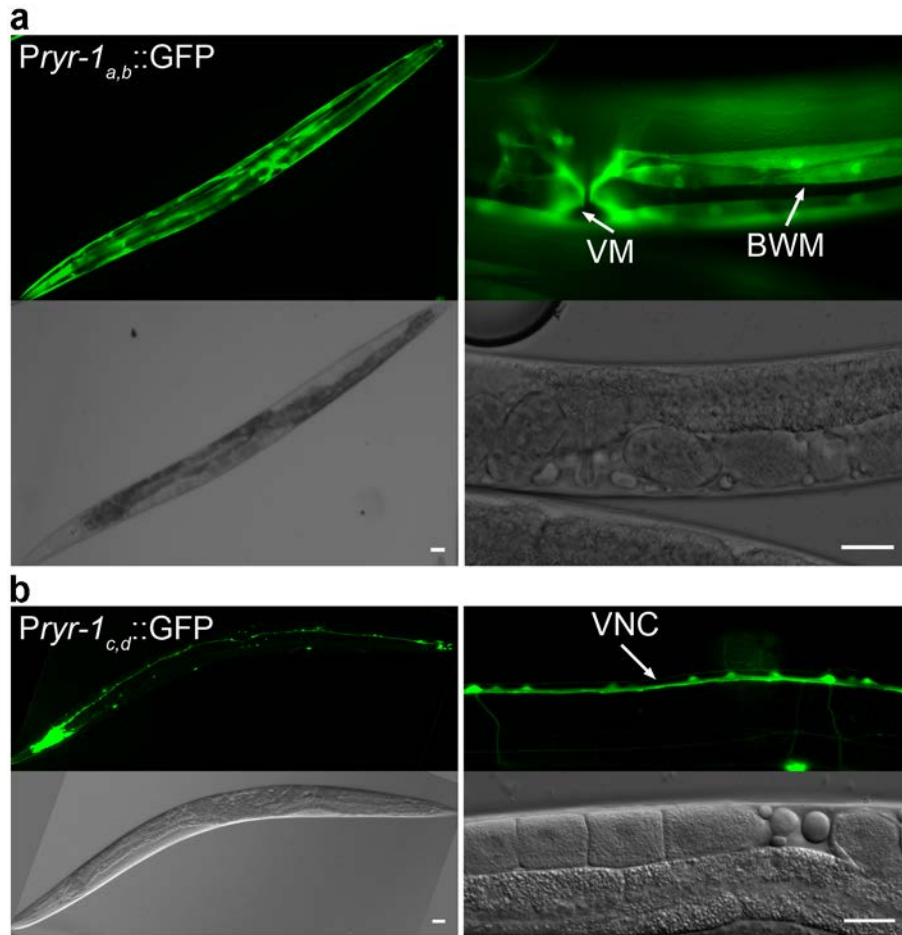

**Supplementary Figure 7. RYR-1 is expressed in muscles and neurons.** The *ryr-1* gene encodes four alternatively spliced isoforms (*a*, *b*, *c*, *d*) with two different initiation sites ([www.wormbase.org](http://www.wormbase.org)). **a**, A GFP reporter construct containing 2.5 kb sequence upstream of the initiation site of *ryr-1a* and *ryr-1b* (*Prryr-1<sub>a,b</sub>::GFP*) drives expression in body-wall muscles (BWM) and vulva muscles (VM). **b**, A GFP reporter construct containing 4.8 kb sequence upstream of the initiation site of *ryr-1c* and *ryr-1d* (*Prryr-1<sub>c,d</sub>::GFP*) drives expression in many neurons, including motor neurons in the ventral nerve cord (VNC). Scale bars, 20  $\mu$ m.

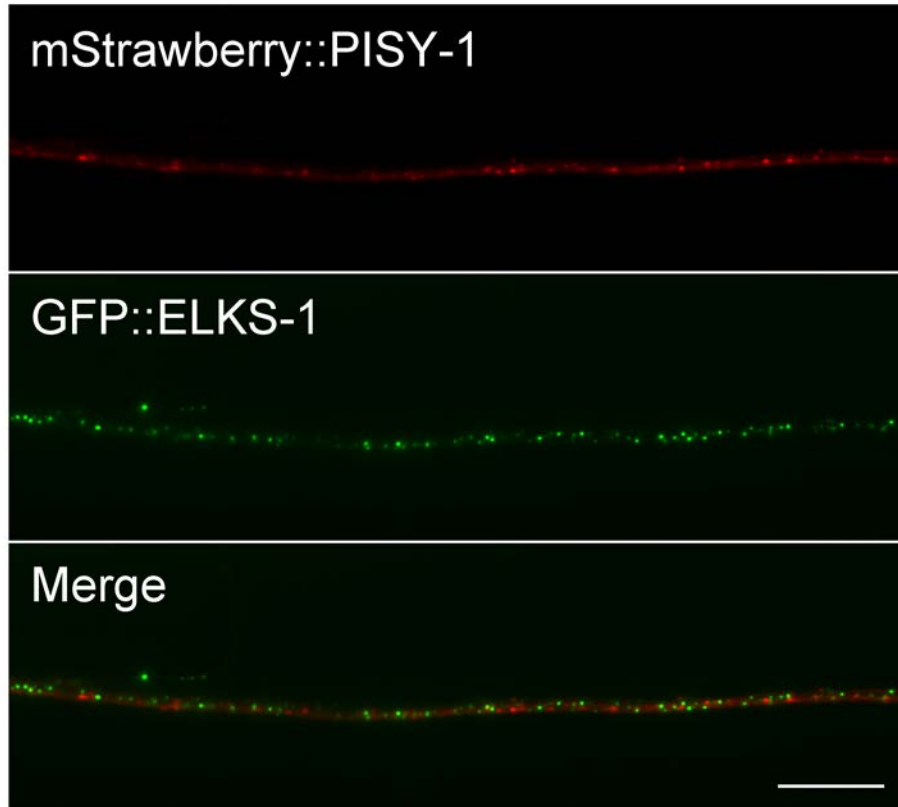

**Supplementary Figure 8. The endoplasmic reticulum (ER) extends throughout the dorsal nerve cord and is close to presynaptic sites.** The ER was labeled by mStrawberry::PISY-1 while presynaptic sites by GFP::ELKS-1. mStrawberry signal was diffuse with some enriched puncta, which probably result from aggregates of the fusion protein, whereas GFP signal mainly appeared as puncta. The merged picture shows that GFP-labeled presynaptic sites overlap with mStrawberry-labeled ER. Scale bar, 10  $\mu$ m.

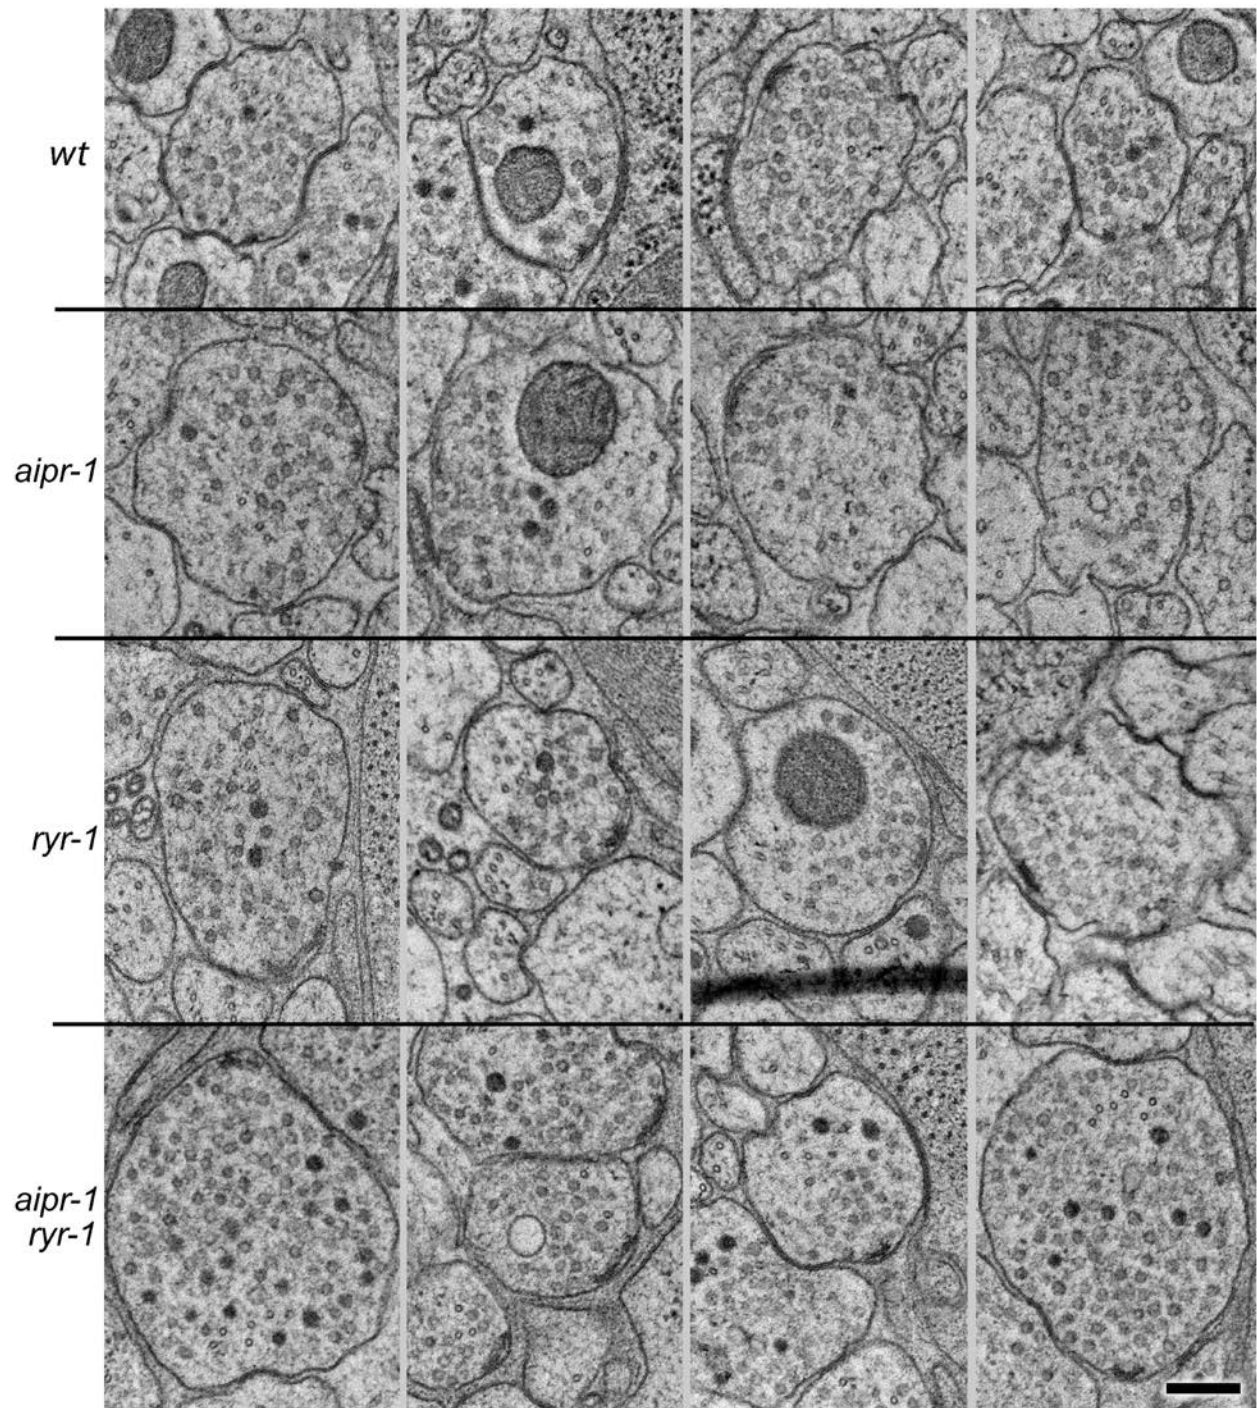

**Supplementary Figure 9. Electron micrographs.** Sample images from acetylcholine synapses of the wild type (*wt*), *aipr-1(zw86)*, *ryr-1(e540)*, and *aipr-1(zw86) ryr-1(e540)* double mutants. Scale bar 200 nm.

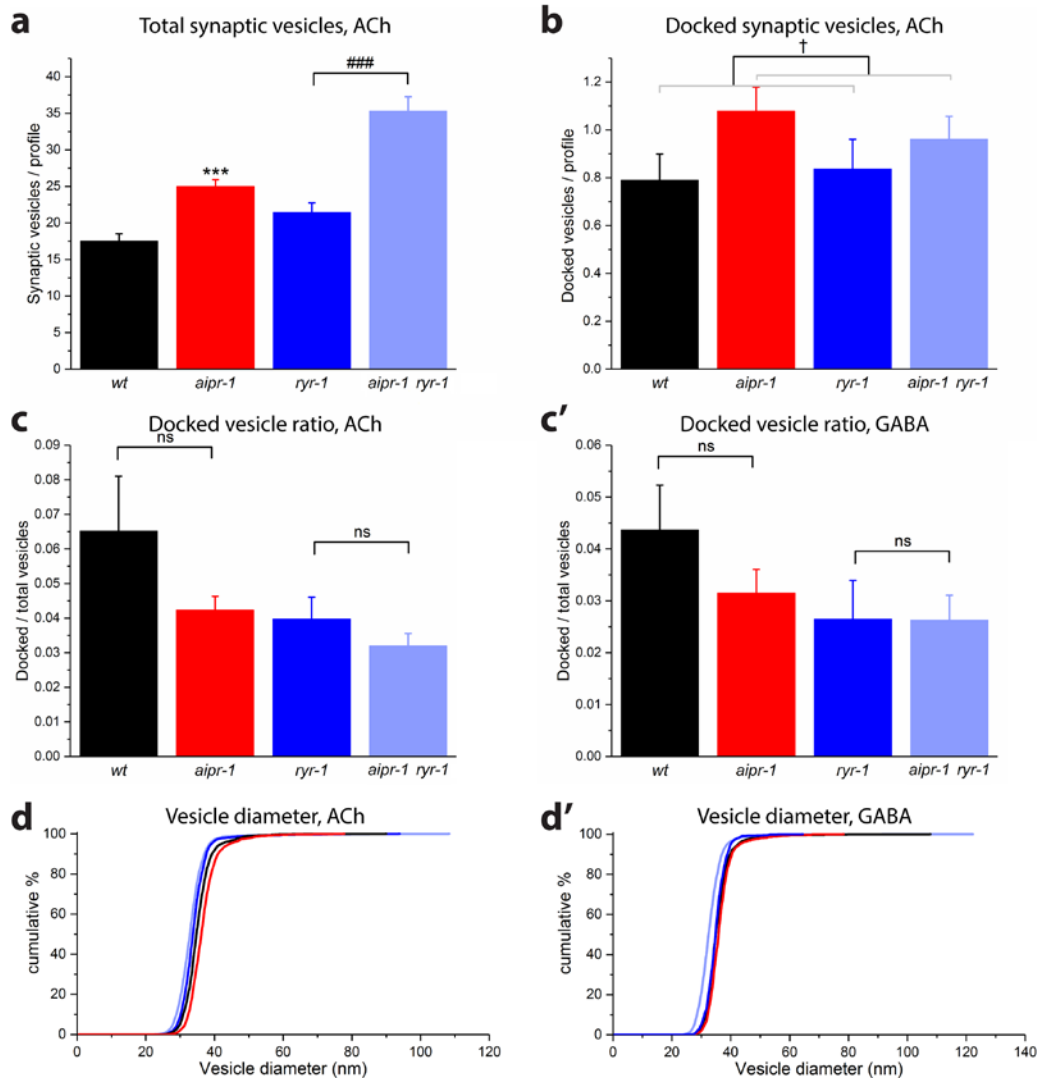

**Supplementary Figure 10. *aipr-1(zw86)* acetylcholine synapses display the same phenotypes as GABA synapses.** **a** and **b**, At acetylcholine synapses, *aipr-1(zw86)* increases synaptic vesicle numbers (**a**) and docked synaptic vesicles (**b**) regardless of the *ryr-1* genotype (total vesicles: *wt* 17.5 ± 1.0 ; *aipr-1* 25.0 ± 0.9; *ryr-1* 21.4 ± 1.3; *aipr-1 ryr-1* 35.2 ± 1.9; docked vesicles: *wt* 0.8 ± 0.1; *aipr-1* 1.1 ± 0.1; *ryr-1* 0.8 ± 0.1; *aipr-1 ryr-1* 1.0 ± 0.1). The increase in synaptic vesicles is profound in the *aipr-1 ryr-1* double mutant in acetylcholine neurons; it is not clear whether this is due to the small data set possible by EM, to a synthetic defect of the mutations, or to a specific response of the acetylcholine synapses. **c**, *aipr-1(zw86)* does not significantly affect the ratio of docked/total synaptic vesicles in both acetylcholine (**c**) and GABA (**c'**) synapses (ACh: *wt* 0.065 ± 0.016 ; *aipr-1* 0.042 ± 0.004; *ryr-1* 0.040 ± 0.006; *aipr-1 ryr-1* 0.032 ± 0.004; GABA: *wt* 0.044 ± 0.009; *aipr-1* 0.032 ± 0.005; *ryr-1* 0.026 ± 0.007; *aipr-1 ryr-1* 0.026 ± 0.005). **d**, Cumulative distribution plots of synaptic vesicle diameters in acetylcholine (**d**) and GABA (**d'**) neurons (mean diameter ACh: *wt* 34.6 ± 0.8 nm ; *aipr-1* 36.9 ± 0.8 nm; *ryr-1* 34.0 ± 0.7 nm; *aipr-1 ryr-1* 32.4 ± 0.5 nm; GABA: *wt* 35.3 ± 0.8 nm; *aipr-1* 36.0 ± 0.6 nm; *ryr-1* 34.4 ± 0.7 nm; *aipr-1 ryr-1* 33.1 ± 0.6). Acetylcholine synapses compared among *wt* (n = 76 synaptic profiles), *aipr-1(zw86)* (n = 102), *ryr-1(e540)* (n = 55), and *aipr-1(zw86) ryr-1(e540)* (n = 101). Data are shown as mean ± s.e.m. \*\*\*  $p < 0.001$  compared with *wt*; ###  $p < 0.001$ , ns  $p > 0.05$  compared between indicated groups. (**a,c,d**) Welch's two-tailed *t*-test, †  $p < 0.05$  *aipr-1(zw86)* effect via generalized linear model, Poisson family (*ryr-1(e540)* effect: ns) (**d**) *aipr-1* compared with *wt* (ACh)  $p = 0.04$ , all other comparisons ns.
