# Supplementary material for: AIP limits neurotransmitter release by inhibiting calcium bursts from the ryanodine receptor
Source: PubMed Central journal article supplement (PMC5680226; doi:10.1038/s41467-017-01704-z), 2017-11-09
Supplement: 41467_2017_1704_MOESM3_ESM.pdf [file 41467_2017_1704_MOESM3_ESM.pdf]

**File Name:** Supplementary Movie 1

**Description:** Thrashing of *wt*

**File Name:** Supplementary Movie 2

**Description:** Thrashing of *aipr-1(zw86)*

**File Name:** Supplementary Movie 3

**Description:** Thrashing of *ryr-1(e540)*

**File Name:** Supplementary Movie 4

**Description:** Thrashing of *aipr-1(zw86) ryr-1(e540)*

**File Name:** Supplementary Movie 5

**Description:** Thrashing of *unc-2(e55)*

**File Name:** Supplementary Movie 6

**Description:** Thrashing of *aipr-1(zw86) unc-2(e55)*

**File Name:** Supplementary Movie 7

**Description:** Calcium transients of wild type

**File Name:** Supplementary Movie 8

**Description:** Calcium transients of *aipr-1* RNAi

**File Name:** Supplementary Movie 9

**Description:** Calcium transients of *ryr-1* RNAi

**File Name:** Supplementary Movie 10

**Description:** Calcium transients of *aipr-1 ryr-1* double RNAi
